# Supplementary material for: Using a Battery of Bioassays to Assess the Toxicity of Wastewater Treatment Plant Effluents in Industrial Parks
Source: MDPI journal article supplement (doi:10.3390/toxics11080702), 2023-08-14
Supplement: s1 [file s1]

# **Supplementary Materials: Using a Battery of Bioassays to Assess the Toxicity of Wastewater Treatment Plant Effluents in Industrial Parks**

## **Authors:**

Bin Yang<sup>1</sup>, Haiyan Cui<sup>1</sup>, Jie Gao<sup>1</sup>, Jing Cao<sup>1</sup>, Göran Klobučar<sup>2</sup>, Mei Li<sup>1\*</sup>

## **Affiliations of authors:**

<sup>1</sup> State Key Laboratory of Pollution Control and Resource Reuse, School of Environment, Nanjing University, Nanjing 210023, China

<sup>2</sup> Department of Biology, Faculty of Science, University of Zagreb, Rooseveltov trg 6, Zagreb, Croatia

## **\*Corresponding author:**

Mei Li (Address: 163 Xianlin Ave., Nanjing University, Nanjing 210023, China)

Email address: [meili@nju.edu.cn](mailto:meili@nju.edu.cn)

## Text S1 Health risk assessment through two exposure routes

The calculation formula of pollutant intake for each exposure route was as follows:

a. Route of oral exposure— $CDI_{\text{respiration}} = \frac{Cw \times ET \times EF \times ED \times (1/VF + 1/EF)}{BW \times AT}$  (1)

b. Route of skin exposure— $CDI_{\text{skin}} = \frac{Cw \times CF \times SA \times AF \times ABSd \times EF \times ED}{BW \times AT}$  (2)

In the formula, Chronic daily intake (CDI) is the sum of polycyclic aromatic hydrocarbons ingested through different exposure routes;  $Cw$  is the concentration of polycyclic aromatic hydrocarbons in the water (mg/L);  $VF$  is the volatility coefficient.

The values of other parameters in the formula are shown in Table S1.

According to the research [1], when a specific exposure route lacks a toxicity parameter, it can be obtained through extrapolation:

$$RfD_{\text{ABS}} = RfD_0 \times ABS_{\text{GI}} \quad (3)$$

$$SF_{\text{ABS}} = SF_0 / ABS_{\text{GI}} \quad (4)$$

In the formula,  $RfD_{\text{ABS}}$  and  $RfD_0$  are non-carcinogenic reference doses,  $SF_{\text{ABS}}$  and  $SF_0$  are carcinogenic slope factors (kg·d/mg),  $ABS_{\text{GI}}$  is the polycyclic aromatic hydrocarbon absorption fraction and the conservative value is 0.5.

### A. Non-carcinogenic risk index (HI)

For the non-carcinogenic risk assessment of eight polycyclic aromatic hydrocarbons, such as naphthalene, the calculation formula was as follows:

$$HI = \frac{CDI}{RfD} \quad (5)$$

### B. Carcinogenic risk value (Risk)

The carcinogenic risk value was defined as: the incidence of cancer caused by exposure to this target pollutant exceeded the normal level in humans, which could be

calculated using the following formula:

$$\text{Low-dose exposure—Risk} = CDI \times SF \quad (6)$$

$$\text{High-dose exposure—Risk} = 1 - \exp(-CDI \times SF) \quad (7)$$

(when the carcinogenic risk value was greater than 0.01, we used this formula.)

**Table S1 VF, RfD and CSF values of polycyclic aromatic hydrocarbons**

| Target pollutant | Exposure route, non-carcinogenic |                                     |                         |                        |                         |             |
|------------------|----------------------------------|-------------------------------------|-------------------------|------------------------|-------------------------|-------------|
|                  | Volatile factor                  | Carcinogenic slope factor/(kg·d/mg) |                         |                        |                         |             |
|                  |                                  | Reference dose/(kg·d/mg)            |                         | Skin                   | Respiration             |             |
|                  |                                  | VF                                  | Skin                    |                        |                         | Respiration |
|                  |                                  |                                     |                         |                        |                         |             |
|                  |                                  | (SFd)                               | (SFi)                   |                        |                         |             |
| NAP              | 6.25 × 10 <sup>4</sup>           | 2.00 × 10 <sup>-2</sup>             | 8.57 × 10 <sup>-4</sup> | -                      | -                       |             |
| ACY              | 1.48 × 10 <sup>5</sup>           | 3.00 × 10 <sup>-2</sup>             | 3.00 × 10 <sup>-2</sup> | -                      | -                       |             |
| ACE              | 1.86 × 10 <sup>5</sup>           | 3.00 × 10 <sup>-2</sup>             | 3.00 × 10 <sup>-2</sup> | -                      | -                       |             |
| FLU              | 5.73 × 10 <sup>5</sup>           | 2.00 × 10 <sup>-2</sup>             | 2.00 × 10 <sup>-2</sup> | -                      | -                       |             |
| PHE              | 1.43 × 10 <sup>6</sup>           | 1.50 × 10 <sup>-2</sup>             | 1.50 × 10 <sup>-2</sup> | -                      | -                       |             |
| ANT              | 8.76 × 10 <sup>5</sup>           | 1.50 × 10 <sup>-1</sup>             | 1.50 × 10 <sup>-1</sup> | -                      | -                       |             |
| FLA              | 6.38 × 10 <sup>5</sup>           | 2.00 × 10 <sup>-2</sup>             | 2.00 × 10 <sup>-2</sup> | -                      | -                       |             |
| BaA              | 1.06 × 10 <sup>7</sup>           | -                                   | -                       | 1.46                   | 3.10 × 10 <sup>-1</sup> |             |
| BbF              | 5.24 × 10 <sup>6</sup>           | -                                   | -                       | 1.46                   | 3.10 × 10 <sup>-1</sup> |             |
| BaP              | 2.72 × 10 <sup>7</sup>           | -                                   | -                       | 1.46 × 10 <sup>1</sup> | 3.10                    |             |
| B (g,h,i) P      | 1.08 × 10 <sup>8</sup>           | 1.50 × 10 <sup>-2</sup>             | 1.50 × 10 <sup>-2</sup> | -                      | -                       |             |

NAP: Naphthalene; ACY: Acenaphthylene; ACE: Acenaphthene; FLU: Fluorene; PHE: Phenanthrene; ANT: Anthracene; FLA: Fluoranthene; BaA: Benzo(a)anthracene; BbF: Benzo(b)fluoranthene; BaP: Benzo(a)pyrene; B(g,h,i) P: Benzo(g, h, i)perylene.

**Table S2 Basic physical and chemical indicators of chemical parks**

|       |           | pH   | COD  | AN   | Ni   | NN   | SS   | TOC  | TN   |
|-------|-----------|------|------|------|------|------|------|------|------|
| W     | Influents | 9.54 | 5640 | 89.9 | 32.6 | 0.79 | 0.42 | 750  | 251  |
| plant | Effluents | 6.51 | 127  | 13.3 | 10.9 | 0.21 | 0.21 | 37.4 | 46.2 |
| J     | Influents | 8.76 | 2901 | 79.2 | 30.7 | 0.94 | 0.57 | 426  | 205  |
| plant | Effluents | 7.21 | 112  | 15.4 | 6.3  | 0.13 | 0.26 | 33.5 | 37.9 |
| T     | Influents | 8.37 | 4900 | 85.1 | 37.2 | 0.82 | 0.79 | 623  | 211  |
| plant | Effluents | 6.22 | 109  | 12.7 | 8.9  | 0.20 | 0.30 | 25.9 | 40.6 |

COD: chemical oxygen demand; AN: ammonia nitrogen ( $\text{NH}_4^+\text{-N}$ ); Ni: nitrate nitrogen ( $\text{NO}_3^-\text{-N}$ );

NN: nitrite nitrogen ( $\text{NO}_2^-\text{-N}$ ); SS: suspended solids; TOC: total organic carbon; TN: total nitrogen.

**Table S3 Cytotoxicity of water extracts from the chemical parks to *S.***

***typhimurium***

| Plants  | Wastewater type | Concentration factor | G value |
|---------|-----------------|----------------------|---------|
| W plant | Influent        | 0.5×                 | 0.51    |
|         |                 | 1×                   | 0.45*   |
|         |                 | 2×                   | 0.25*   |
|         |                 | 5×                   | 0.11*   |
|         |                 | 0.5×                 | 0.54    |
|         | Effluent        | 1×                   | 0.48*   |
|         |                 | 2×                   | 0.47*   |
|         |                 | 5×                   | 0.40*   |
|         |                 | 0.5×                 | 0.51    |
|         |                 | 1×                   | 0.41*   |
| J plant | Influent        | 2×                   | 0.40*   |
|         |                 | 5×                   | 0.23*   |
|         |                 | 0.5×                 | 0.52    |
|         | Effluent        | 1×                   | 0.49*   |
|         |                 | 2×                   | 0.48*   |
|         |                 | 5×                   | 0.38*   |
|         |                 | 0.5×                 | 0.50    |
|         | Influent        | 1×                   | 0.46*   |
|         |                 | 2×                   | 0.31*   |
|         |                 | 5×                   | 0.19*   |
| T plant | Effluent        | 0.5×                 | 0.54    |
|         |                 | 1×                   | 0.49*   |
|         |                 | 2×                   | 0.48*   |
|         |                 | 5×                   | 0.46*   |
|         |                 |                      |         |

G value: bacterial growth factor value. \*,  $p < 0.05$ , compared with the 0.5× group.

**Table S4 Induction rate of the water extracts from the chemical industry parks  
on *S. typhimurium***

| Plants  | Wastewater type | Concentration factor | IR value |
|---------|-----------------|----------------------|----------|
| W plant | Influent        | 0.5×                 | 2.09     |
|         |                 | 1×                   | -        |
|         |                 | 2×                   | -        |
|         |                 | 5×                   | -        |
|         |                 | 0.5×                 | 1.89     |
|         | Effluent        | 1×                   | -        |
|         |                 | 2×                   | -        |
|         |                 | 5×                   | -        |
|         |                 | 0.5×                 | 2.13     |
|         |                 | 1×                   | -        |
| J plant | Influent        | 2×                   | -        |
|         |                 | 5×                   | -        |
|         |                 | 0.5×                 | 1.95     |
|         | Effluent        | 1×                   | -        |
|         |                 | 2×                   | -        |
|         |                 | 5×                   | -        |
|         |                 | 0.5×                 | 2.15     |
|         | Influent        | 1×                   | -        |
|         |                 | 2×                   | -        |
|         |                 | 5×                   | -        |
| T plant | Effluent        | 0.5×                 | 1.85     |
|         |                 | 1×                   | -        |
|         |                 | 2×                   | -        |
|         |                 | 5×                   | -        |
|         |                 | 0.5×                 | 1.85     |
|         |                 | 1×                   | -        |

IR value: induction ratio value.

**Table S5** Health risk index of non-carcinogenic effects of pollutants via different exposure routes according to the risk characterization model

| Compound    | Respiratory exposure   |                        |                       |                        |                        |                        | Skin exposure         |                       |                       |                       |                       |                       |
|-------------|------------------------|------------------------|-----------------------|------------------------|------------------------|------------------------|-----------------------|-----------------------|-----------------------|-----------------------|-----------------------|-----------------------|
|             | W plant                |                        | J plant               |                        | T plant                |                        | W plant               |                       | J plant               |                       | T plant               |                       |
|             | Influent               | Effluent               | Influent              | Effluent               | Influent               | Effluent               | Influent              | Effluent              | Influent              | Effluent              | Influent              | Effluent              |
| NAP         | $1.55 \times 10^{-5}$  | $5.13 \times 10^{-8}$  | $1.77 \times 10^{-5}$ | $2.05 \times 10^{-8}$  | $1.44 \times 10^{-5}$  | $2.93 \times 10^{-8}$  | $1.17 \times 10^{-5}$ | $3.88 \times 10^{-8}$ | $1.33 \times 10^{-5}$ | $1.55 \times 10^{-8}$ | $1.09 \times 10^{-5}$ | $2.21 \times 10^{-8}$ |
| ACY         | $2.89 \times 10^{-8}$  | -                      | $6.71 \times 10^{-8}$ | $4.90 \times 10^{-10}$ | $3.62 \times 10^{-8}$  | -                      | $6.74 \times 10^{-8}$ | -                     | $1.56 \times 10^{-7}$ | $1.14 \times 10^{-9}$ | $8.45 \times 10^{-8}$ | -                     |
| ACE         | $3.79 \times 10^{-9}$  | -                      | $1.26 \times 10^{-8}$ | $3.18 \times 10^{-10}$ | $7.81 \times 10^{-9}$  | $1.59 \times 10^{-10}$ | $2.62 \times 10^{-8}$ | -                     | $8.75 \times 10^{-8}$ | $2.20 \times 10^{-9}$ | $5.40 \times 10^{-8}$ | $1.10 \times 10^{-9}$ |
| FLU         | -                      | $1.78 \times 10^{-8}$  | $1.32 \times 10^{-8}$ | -                      | $1.25 \times 10^{-8}$  | -                      | -                     | $1.24 \times 10^{-7}$ | $9.22 \times 10^{-8}$ | -                     | $8.76 \times 10^{-8}$ | -                     |
| PHE         | $3.12 \times 10^{-9}$  | $3.19 \times 10^{-10}$ | $4.98 \times 10^{-9}$ | $1.27 \times 10^{-10}$ | -                      | -                      | $5.43 \times 10^{-8}$ | $5.54 \times 10^{-9}$ | $8.65 \times 10^{-8}$ | $2.21 \times 10^{-9}$ | -                     | -                     |
| ANT         | $1.28 \times 10^{-7}$  | $1.56 \times 10^{-9}$  | $1.47 \times 10^{-7}$ | -                      | -                      | $2.18 \times 10^{-9}$  | $1.36 \times 10^{-6}$ | $1.66 \times 10^{-8}$ | $1.57 \times 10^{-6}$ | -                     | -                     | $2.33 \times 10^{-8}$ |
| FLA         | $2.23 \times 10^{-10}$ | -                      | $5.6 \times 10^{-10}$ | $3.86 \times 10^{-11}$ | $1.25 \times 10^{-10}$ | -                      | $2.85 \times 10^{-8}$ | -                     | $7.22 \times 10^{-8}$ | $4.94 \times 10^{-9}$ | $1.59 \times 10^{-8}$ | -                     |
| BaA         | $3.71 \times 10^{-10}$ | $6.57 \times 10^{-11}$ | $1.49 \times 10^{-9}$ | $1.43 \times 10^{-10}$ | $1.85 \times 10^{-10}$ | -                      | $2.35 \times 10^{-8}$ | $4.18 \times 10^{-9}$ | $9.51 \times 10^{-8}$ | $9.13 \times 10^{-9}$ | $1.17 \times 10^{-8}$ | -                     |
| BbF         | $1.19 \times 10^{-9}$  | $2.47 \times 10^{-11}$ | $1.48 \times 10^{-9}$ | $4.94 \times 10^{-11}$ | $1.38 \times 10^{-9}$  | 6.82E-11               | $3.86 \times 10^{-7}$ | $7.99 \times 10^{-9}$ | $4.79 \times 10^{-7}$ | $1.59 \times 10^{-8}$ | $4.46 \times 10^{-7}$ | $2.20 \times 10^{-8}$ |
| BaP         | $7.89 \times 10^{-8}$  | $9.86 \times 10^{-9}$  | $2.09 \times 10^{-7}$ | $1.23 \times 10^{-8}$  | $1.66 \times 10^{-7}$  | $8.63 \times 10^{-9}$  | $1.41 \times 10^{-7}$ | $1.77 \times 10^{-8}$ | $3.76 \times 10^{-7}$ | $2.21 \times 10^{-8}$ | $2.99 \times 10^{-7}$ | $1.55 \times 10^{-8}$ |
| B (g,h,i) P | $3.21 \times 10^{-9}$  | -                      | $5.62 \times 10^{-9}$ | $7.14 \times 10^{-11}$ | $4.42 \times 10^{-9}$  | -                      | $4.97 \times 10^{-8}$ | -                     | $8.73 \times 10^{-8}$ | $1.10 \times 10^{-9}$ | $6.85 \times 10^{-8}$ | -                     |

NAP: Naphthalene; ACY: Acenaphthylene; ACE: Acenaphthene; FLU: Fluorene; PHE: Phenanthrene; ANT: Anthracene; FLA: Fluoranthene; BaA: Benzo(a)anthracene; BbF: Benzo(b)fluoranthene; BaP: Benzo(a)pyrene; B(g,h,i) P: Benzo(g, h, i)perylene; “-” : no health risks.



**Table S6.** Health risk index of carcinogenic effects of pollutants via different exposure routes according to the risk characterization model

| Compound    | Respiratory exposure   |                        |                       |                        |                        |                        | Skin exposure         |                       |                       |                       |                       |                       |
|-------------|------------------------|------------------------|-----------------------|------------------------|------------------------|------------------------|-----------------------|-----------------------|-----------------------|-----------------------|-----------------------|-----------------------|
|             | W plant                |                        | J plant               |                        | T plant                |                        | W plant               |                       | J plant               |                       | T plant               |                       |
|             | Influent               | Effluent               | Influent              | Effluent               | Influent               | Effluent               | Influent              | Effluent              | Influent              | Effluent              | Influent              | Effluent              |
| NAP         | $4.52 \times 10^{-5}$  | $1.49 \times 10^{-7}$  | $5.16 \times 10^{-5}$ | $5.98 \times 10^{-8}$  | $4.22 \times 10^{-5}$  | $8.55 \times 10^{-8}$  | $3.42 \times 10^{-5}$ | $1.13 \times 10^{-7}$ | $3.90 \times 10^{-5}$ | $4.52 \times 10^{-8}$ | $3.19 \times 10^{-5}$ | $6.46 \times 10^{-8}$ |
| ACY         | $8.43 \times 10^{-8}$  | -                      | $1.95 \times 10^{-7}$ | $1.42 \times 10^{-9}$  | $1.05 \times 10^{-7}$  | -                      | $1.96 \times 10^{-7}$ | -                     | $4.56 \times 10^{-7}$ | $3.33 \times 10^{-9}$ | $2.46 \times 10^{-7}$ | -                     |
| ACE         | $1.10 \times 10^{-8}$  | -                      | $3.69 \times 10^{-8}$ | $9.29 \times 10^{-10}$ | $2.27 \times 10^{-8}$  | $4.64 \times 10^{-10}$ | $7.65 \times 10^{-8}$ | -                     | $2.55 \times 10^{-7}$ | $6.43 \times 10^{-9}$ | $1.57 \times 10^{-7}$ | $3.21 \times 10^{-9}$ |
| FLU         | -                      | $5.18 \times 10^{-8}$  | $3.85 \times 10^{-8}$ | -                      | $3.64 \times 10^{-8}$  | -                      | -                     | $3.62 \times 10^{-7}$ | $2.69 \times 10^{-7}$ | -                     | $2.55 \times 10^{-7}$ | -                     |
| PHE         | $9.12 \times 10^{-9}$  | $9.31 \times 10^{-10}$ | $1.45 \times 10^{-8}$ | $3.72 \times 10^{-10}$ | -                      | -                      | $1.58 \times 10^{-7}$ | $1.61 \times 10^{-8}$ | $2.52 \times 10^{-7}$ | $6.47 \times 10^{-9}$ | -                     | -                     |
| ANT         | $3.73 \times 10^{-7}$  | $4.55 \times 10^{-9}$  | $4.31 \times 10^{-7}$ | -                      | -                      | $6.38 \times 10^{-9}$  | $3.98 \times 10^{-6}$ | $4.85 \times 10^{-8}$ | $4.59 \times 10^{-6}$ | -                     | -                     | $6.79 \times 10^{-8}$ |
| FLA         | $6.51 \times 10^{-10}$ | -                      | 1.64                  | $1.12 \times 10^{-10}$ | $3.64 \times 10^{-10}$ | -                      | $8.31 \times 10^{-8}$ | -                     | $2.10 \times 10^{-7}$ | $1.44 \times 10^{-8}$ | $4.65 \times 10^{-8}$ | -                     |
| BaA         | $1.08 \times 10^{-9}$  | $1.91 \times 10^{-10}$ | $4.36 \times 10^{-9}$ | $4.18 \times 10^{-10}$ | $5.40 \times 10^{-10}$ | -                      | $6.88 \times 10^{-8}$ | $1.22 \times 10^{-8}$ | $2.77 \times 10^{-7}$ | $2.66 \times 10^{-8}$ | $3.44 \times 10^{-8}$ | -                     |
| BbF         | 3.48E-09               | $7.20 \times 10^{-11}$ | $4.32 \times 10^{-9}$ | $1.44 \times 10^{-10}$ | $4.02 \times 10^{-9}$  | $1.99 \times 10^{-10}$ | $1.12 \times 10^{-6}$ | $2.33 \times 10^{-8}$ | 1.39E-06              | $4.66 \times 10^{-8}$ | $1.30 \times 10^{-6}$ | $6.43 \times 10^{-8}$ |
| BaP         | $2.30 \times 10^{-7}$  | $2.87 \times 10^{-8}$  | $6.11 \times 10^{-7}$ | $3.59 \times 10^{-8}$  | $4.85 \times 10^{-7}$  | $2.51 \times 10^{-8}$  | $4.13 \times 10^{-7}$ | $5.18 \times 10^{-8}$ | $1.09 \times 10^{-6}$ | $6.44 \times 10^{-8}$ | $8.75 \times 10^{-7}$ | $4.55 \times 10^{-8}$ |
| B (g,h,i) P | $9.37 \times 10^{-9}$  | -                      | $1.64 \times 10^{-8}$ | $2.08 \times 10^{-10}$ | $1.29 \times 10^{-8}$  | -                      | $1.45 \times 10^{-7}$ | -                     | $2.54 \times 10^{-7}$ | $3.22 \times 10^{-9}$ | $2.00 \times 10^{-7}$ | -                     |

NAP: Naphthalene; ACY: Acenaphthylene; ACE: Acenaphthene; FLU: Fluorene; PHE: Phenanthrene; ANT: Anthracene; FLA: Fluoranthene; BaA: Benzo(a)anthracene; BbF: Benzo(b)fluoranthene; BaP: Benzo(a)pyrene; B(g,h,i) P: Benzo(g, h, i)perylene; “-” : no health risks.

**Reference:**

1. Feng H.-Y.; Fu X.-Q.; Zhao Q. Health risk assessment of polycyclic aromatic hydrocarbons in soils of Ningbo area, China. J Agro-Environ Sci. 2011 30(10), 1998-2004.
